# Supplementary material for: Analysis of Whole-Genome Sequences of Pathogenic Gram-Positive and Gram-Negative Isolates from the Same Hospital Environment to Investigate Common Evolutionary Trends Associated with Horizontal Gene Exchange, Mutations and DNA Methylation Patterning
Source: MDPI journal article supplement (doi:10.3390/microorganisms11020323), 2023-01-27
Supplement: s1 [file s1]

**Supplementary Table S1.** Antibiotic resistance genes found in genomes of the isolates

| Strain                            | Gene                              | Mechanism of action | In GI | Resistance                                                                                                     |
|-----------------------------------|-----------------------------------|---------------------|-------|----------------------------------------------------------------------------------------------------------------|
| <i>Klebsiella pneumonia</i> 13/97 |                                   |                     |       |                                                                                                                |
| 13/97:<br>Chr                     | <i>eptB</i><br>[218462..220135]   | target alteration   |       | peptide                                                                                                        |
|                                   | <i>arnT</i><br>[300397..302052]   | target alteration   |       | peptide                                                                                                        |
|                                   | <i>CRP</i><br>[411005..411637]    | efflux              |       | macrolide,<br>fluoroquinolone,<br>penam                                                                        |
|                                   | <i>rsmA</i><br>[1096931..1097116] | efflux              |       | fluoroquinolone,<br>diaminopyrimidine,<br>phenicol                                                             |
|                                   | <i>kpnH</i><br>[1105114..1106649] | efflux              |       | macrolide,<br>fluoroquinolone,<br>aminoglycoside,<br>carbapenem,<br>cephalosporin,<br>penam, peptide,<br>penem |
|                                   | <i>kpnG</i><br>[1106665..1107837] | efflux              |       | macrolide,<br>fluoroquinolone,<br>aminoglycoside,<br>carbapenem,<br>cephalosporin,<br>penam, peptide,<br>penem |
|                                   | <i>emrR</i><br>[1107963..1108493] | efflux              |       | fluoroquinolone                                                                                                |
|                                   | <i>adeF</i><br>[1175284..1178436] | efflux              | GI#1  | fluoroquinolone,<br>tetracycline                                                                               |
|                                   | <i>oqxA</i><br>[1178460..1179635] | efflux              | GI#1  | fluoroquinolone,<br>glycylcycline,<br>tetracycline,<br>diaminopyrimidine,<br>nitrofurantoin                    |
|                                   | <i>adeF</i><br>[1415019..1418132] | efflux              |       | fluoroquinolone,<br>tetracycline                                                                               |
|                                   | <i>adeF</i><br>[1422608..1425721] | efflux              |       | fluoroquinolone,<br>tetracycline                                                                               |
|                                   | <i>adeF</i>                       | efflux              | GI#4  | fluoroquinolone,                                                                                               |

|  |                                     |                                            |  |                                                                                                                                                                       |
|--|-------------------------------------|--------------------------------------------|--|-----------------------------------------------------------------------------------------------------------------------------------------------------------------------|
|  | [1463467..1466580]                  |                                            |  | tetracycline                                                                                                                                                          |
|  | <i>baeR</i><br>[1769838..1770560]   | efflux                                     |  | aminoglycoside,<br>aminocoumarin                                                                                                                                      |
|  | <i>H-NS</i><br>[2278652..2279059]   | efflux                                     |  | macrolide,<br>fluoroquinolone,<br>cephalosporin,<br>cephamycin, penam,<br>tetracycline                                                                                |
|  | <i>marA</i><br>[2865787..2866161]   | efflux; reduced permeability to antibiotic |  | fluoroquinolone,<br>monobactam,<br>carbapenem,<br>cephalosporin,<br>glycylcycline,<br>cephamycin, penam,<br>tetracycline,<br>rifamycin, phenicol,<br>triclosan, penem |
|  | <i>SHV-11</i><br>[2886264..2887124] | beta-lactamase                             |  | carbapenem,<br>cephalosporin,<br>penam                                                                                                                                |
|  | <i>kpnF</i><br>[2927174..2927503]   | efflux                                     |  | macrolide,<br>aminoglycoside,<br>cephalosporin,<br>tetracycline, peptide,<br>rifamycin                                                                                |
|  | <i>kpnE</i><br>[2927490..2927852]   | efflux                                     |  | macrolide,<br>aminoglycoside,<br>cephalosporin,<br>tetracycline, peptide,<br>rifamycin                                                                                |
|  | <i>ompK37</i><br>[3052873..3053997] | reduced permeability to antibiotic         |  | monobactam,<br>carbapenem,<br>cephalosporin,<br>cephamycin, penam,<br>penem                                                                                           |
|  | <i>ompA</i><br>[3547574..3548644]   | reduced permeability to antibiotic         |  | monobactam,<br>carbapenem,<br>cephalosporin,<br>cephamycin, penam,<br>penem                                                                                           |
|  | <i>msbA</i><br>[3598015..3599763]   | efflux                                     |  | nitroimidazole                                                                                                                                                        |
|  | <i>ampH</i>                         | beta-lactamase                             |  | cephalosporin,                                                                                                                                                        |

|                                             |                                            |              |  |                                                                                                                                                                                                           |
|---------------------------------------------|--------------------------------------------|--------------|--|-----------------------------------------------------------------------------------------------------------------------------------------------------------------------------------------------------------|
|                                             | [4317245..4318405]                         |              |  | penam                                                                                                                                                                                                     |
|                                             | <i>LptD</i><br>[4619756..4622104]          | efflux       |  | carbapenem, peptide,<br>aminocoumarin,<br>rifamycin                                                                                                                                                       |
|                                             | <i>FosA6</i><br>[4762321..4762740]         | inactivation |  | fosfomycin                                                                                                                                                                                                |
|                                             | UhpT E350Q<br>[39078..40469]               | mutation     |  | fosfomycin                                                                                                                                                                                                |
|                                             | EF-Tu R234F<br>[426683..427867]            | mutation     |  | elfamycin                                                                                                                                                                                                 |
|                                             | Pbp3 D350N,<br>S357N<br>[4572290..4574056] | mutation     |  | cephalosporin,<br>cephamycin, penam                                                                                                                                                                       |
|                                             | MarR G103S,<br>Y137H<br>[2865332..2865766] | mutation     |  | fluoroquinolone,<br>cephalosporin,<br>glycylcycline,<br>penam, tetracycline,<br>rifamycin, phenicol,<br>triclosan                                                                                         |
| <b><i>Pseudomonas aeruginosa</i> 16/222</b> |                                            |              |  |                                                                                                                                                                                                           |
| 16/222:<br>Chr                              | <i>triA</i><br>[185842..186945]            | efflux       |  | triclosan                                                                                                                                                                                                 |
|                                             | <i>triB</i><br>[186942..188012]            | efflux       |  | triclosan                                                                                                                                                                                                 |
|                                             | <i>triC</i><br>[188009..191056]            | efflux       |  | triclosan                                                                                                                                                                                                 |
|                                             | <i>mexA</i><br>[478590..479741]            | efflux       |  | macrolide,<br>fluoroquinolone,<br>monobactam,<br>carbapenem,<br>cephalosporin,<br>cephamycin, penam,<br>tetracycline, peptide,<br>aminocoumarin,<br>diaminopyrimidine,<br>sulfonamide,<br>phenicol, penem |
|                                             | <i>mexB</i><br>[479757..482897]            | efflux       |  | macrolide,<br>fluoroquinolone,<br>monobactam,<br>carbapenem,<br>cephalosporin,                                                                                                                            |

|  |                                  |              |  |                                                                                                                                                                                                                                                       |
|--|----------------------------------|--------------|--|-------------------------------------------------------------------------------------------------------------------------------------------------------------------------------------------------------------------------------------------------------|
|  |                                  |              |  | cephamycin, penam, tetracycline, peptide, aminocoumarin, diaminopyrimidine, sulfonamide, phenicol, penem                                                                                                                                              |
|  | <i>oprM</i><br>[482899..484356]  | efflux       |  | macrolide, fluoroquinolone, monobactam, aminoglycoside, carbapenem, cephalosporin, cephamycin, penam, tetracycline, peptide, acridine dye, aminocoumarin, diaminopyrimidine, sulfonamide, phenicol, penem, disinfecting agents and intercalating dyes |
|  | <i>opmD</i><br>[805899..807362]  | efflux       |  | fluoroquinolone, tetracycline, acridine dye, disinfecting agents and intercalating dyes                                                                                                                                                               |
|  | <i>mexI</i><br>[807359..810448]  | efflux       |  | fluoroquinolone, tetracycline, acridine dye, disinfecting agents and intercalating dyes                                                                                                                                                               |
|  | <i>mexH</i><br>[810461..811573]  | efflux       |  | fluoroquinolone, tetracycline, acridine dye, disinfecting agents and intercalating dyes                                                                                                                                                               |
|  | <i>mexG</i><br>[811581..812027]  | efflux       |  | fluoroquinolone, tetracycline, acridine dye, disinfecting agents and intercalating dyes                                                                                                                                                               |
|  | <i>bcr-1</i><br>[956045..957253] | efflux       |  | bicyclomycin                                                                                                                                                                                                                                          |
|  | <i>APH(3')-IIb</i>               | inactivation |  | aminoglycoside                                                                                                                                                                                                                                        |

|  |                                    |                   |      |                                                                                                                                                 |
|--|------------------------------------|-------------------|------|-------------------------------------------------------------------------------------------------------------------------------------------------|
|  | [973952..974758]                   |                   |      |                                                                                                                                                 |
|  | <i>PDC-19a</i><br>[987004..988197] | inactivation      |      | monobactam,<br>carbapenem,<br>cephalosporin                                                                                                     |
|  | <i>yajC</i><br>[1324844..1325182]  | efflux            |      | fluoroquinolone,<br>cephalosporin,<br>glycylcycline, penam,<br>tetracycline,<br>rifamycin, phenicol,<br>triclosan                               |
|  | <i>mexL</i><br>[1483064..1483702]  | efflux            |      | macrolide,<br>tetracycline, triclosan                                                                                                           |
|  | <i>mexJ</i><br>[1483798..1484901]  | efflux            |      | macrolide,<br>tetracycline, triclosan                                                                                                           |
|  | <i>mexK</i><br>[1484906..1487983]  | efflux            |      | macrolide,<br>tetracycline, triclosan                                                                                                           |
|  | <i>arnA</i><br>[1603989..1605977]  | target alteration | GI#6 | peptide                                                                                                                                         |
|  | <i>mexP</i><br>[1644197..1645354]  | efflux            |      | macrolide,<br>carbapenem,<br>tetracycline, acridine<br>dye,<br>diaminopyrimidine,<br>phenicol, disinfecting<br>agents and<br>intercalating dyes |
|  | <i>mexQ</i><br>[1645351..1648512]  | efflux            |      | macrolide,<br>carbapenem,<br>tetracycline, acridine<br>dye,<br>diaminopyrimidine,<br>phenicol, disinfecting<br>agents and<br>intercalating dyes |
|  | <i>opmE</i><br>[1648509..1649984]  | efflux            |      | macrolide,<br>carbapenem,<br>tetracycline, acridine<br>dye,<br>diaminopyrimidine,<br>phenicol, disinfecting<br>agents and<br>intercalating dyes |
|  | <i>cpxR</i>                        | efflux            |      | macrolide,                                                                                                                                      |

|  |                                   |                           |  |                                                                                                                                                                                                                |
|--|-----------------------------------|---------------------------|--|----------------------------------------------------------------------------------------------------------------------------------------------------------------------------------------------------------------|
|  | [2000915..2001592]                |                           |  | fluoroquinolone,<br>monobactam,<br>aminoglycoside,<br>carbapenem,<br>cephalosporin,<br>cephamycin, penam,<br>tetracycline, peptide,<br>aminocoumarin,<br>diaminopyrimidine,<br>sulfonamide,<br>phenicol, penem |
|  | <i>cprS</i><br>[2133964..2135259] | target alteration; efflux |  | peptide                                                                                                                                                                                                        |
|  | <i>cprR</i><br>[2135256..2135927] | target alteration; efflux |  | peptide                                                                                                                                                                                                        |
|  | <i>muxA</i><br>[2942578..2943858] | efflux                    |  | macrolide,<br>monobactam,<br>tetracycline,<br>aminocoumarin                                                                                                                                                    |
|  | <i>muxB</i><br>[2943855..2946986] | efflux                    |  | macrolide,<br>monobactam,<br>tetracycline,<br>aminocoumarin                                                                                                                                                    |
|  | <i>muxC</i><br>[2946983..2950093] | efflux                    |  | macrolide,<br>monobactam,<br>tetracycline,<br>aminocoumarin                                                                                                                                                    |
|  | <i>opmB</i><br>[2950090..2951586] | efflux                    |  | macrolide,<br>monobactam,<br>tetracycline,<br>aminocoumarin                                                                                                                                                    |
|  | <i>oprN</i><br>[2983262..2984680] | efflux                    |  | fluoroquinolone,<br>diaminopyrimidine,<br>phenicol                                                                                                                                                             |
|  | <i>mexF</i><br>[2984677..2987865] | efflux                    |  | fluoroquinolone,<br>diaminopyrimidine,<br>phenicol                                                                                                                                                             |
|  | <i>mexE</i><br>[2987887..2989131] | efflux                    |  | fluoroquinolone,<br>diaminopyrimidine,<br>phenicol                                                                                                                                                             |
|  | SoxR G74R<br>[3288231..3288701]   | mutation                  |  | fluoroquinolone,<br>cephalosporin,<br>glycylcycline, penam,                                                                                                                                                    |

|  |                                   |                                            |       |                                                                                                                                                                                               |
|--|-----------------------------------|--------------------------------------------|-------|-----------------------------------------------------------------------------------------------------------------------------------------------------------------------------------------------|
|  |                                   |                                            |       | tetracycline, acridine dye, rifamycin, phenicol, triclosan, disinfecting agents and intercalating dyes                                                                                        |
|  | <i>adeF</i><br>[3688321..3691458] | efflux                                     |       | fluoroquinolone, tetracycline                                                                                                                                                                 |
|  | <i>parR</i><br>[3982452..3983159] | efflux; reduced permeability to antibiotic |       | macrolide, fluoroquinolone, monobactam, aminoglycoside, carbapenem, cephalosporin, cephamycin, penam, tetracycline, acridine dye, phenicol, penem, disinfecting agents and intercalating dyes |
|  | <i>parS</i><br>[3983160..3984446] | efflux; reduced permeability to antibiotic |       | macrolide, fluoroquinolone, monobactam, aminoglycoside, carbapenem, cephalosporin, cephamycin, penam, tetracycline, acridine dye, phenicol, penem, disinfecting agents and intercalating dyes |
|  | <i>mexN</i><br>[4483260..4486370] | efflux                                     |       | phenicol                                                                                                                                                                                      |
|  | <i>mexM</i><br>[4486367..4487524] | efflux                                     |       | phenicol                                                                                                                                                                                      |
|  | <i>pmpM</i><br>[4579586..4581019] | efflux                                     |       | fluoroquinolone, aminoglycoside, benzalkonium chloride                                                                                                                                        |
|  | <i>fosA</i><br>[4846590..4846997] | inactivation                               |       | fosfomycin                                                                                                                                                                                    |
|  | <i>rsmA</i><br>[5075506..5075691] | efflux                                     |       | fluoroquinolone, diaminopyrimidine, phenicol                                                                                                                                                  |
|  | <i>catB7</i>                      | inactivation                               | GI#22 | phenicol                                                                                                                                                                                      |

|  |                                   |                           |  |                                                                                                                                                 |
|--|-----------------------------------|---------------------------|--|-------------------------------------------------------------------------------------------------------------------------------------------------|
|  | [5355382..5356020]                |                           |  |                                                                                                                                                 |
|  | <i>mexV</i><br>[5522727..5523857] | efflux                    |  | macrolide,<br>fluoroquinolone,<br>tetracycline, acridine<br>dye, phenicol,<br>disinfecting agents<br>and intercalating dyes                     |
|  | <i>mexW</i><br>[5523908..5526964] | efflux                    |  | macrolide,<br>fluoroquinolone,<br>tetracycline, acridine<br>dye, phenicol,<br>disinfecting agents<br>and intercalating dyes                     |
|  | <i>oprJ</i><br>[5992953..5994392] | efflux                    |  | macrolide,<br>fluoroquinolone,<br>aminoglycoside,<br>cephalosporin,<br>penam, tetracycline,<br>aminocoumarin,<br>diaminopyrimidine,<br>phenicol |
|  | <i>mexD</i><br>[5994398..5997529] | efflux                    |  | macrolide,<br>fluoroquinolone,<br>aminoglycoside,<br>cephalosporin,<br>penam, tetracycline,<br>aminocoumarin,<br>diaminopyrimidine,<br>phenicol |
|  | <i>mexC</i><br>[5997557..5998621] | efflux                    |  | macrolide,<br>fluoroquinolone,<br>aminoglycoside,<br>cephalosporin,<br>penam, tetracycline,<br>aminocoumarin,<br>diaminopyrimidine,<br>phenicol |
|  | <i>basS</i><br>[6221749..6223182] | target alteration; efflux |  | peptide                                                                                                                                         |
|  | <i>opmH</i><br>[6441985..6443433] | efflux                    |  | triclosan                                                                                                                                       |
|  | <i>emrE</i><br>[6463987..6464319] | efflux                    |  | aminoglycoside                                                                                                                                  |



|  |                                        |                           |      |                                                                                                                                                                                                           |
|--|----------------------------------------|---------------------------|------|-----------------------------------------------------------------------------------------------------------------------------------------------------------------------------------------------------------|
|  | <i>OXA-488</i><br>[7066768..7067556]   | beta-lactamase            |      | carbapenem,<br>cephalosporin, penam                                                                                                                                                                       |
|  | <i>gyrA</i> T83I<br>[2036983..2039754] | mutation                  | GI#7 | fluoroquinolone                                                                                                                                                                                           |
|  | <i>mexR</i><br>[477872..478315]        | target alteration; efflux |      | macrolide,<br>fluoroquinolone,<br>monobactam,<br>carbapenem,<br>cephalosporin,<br>cephamycin, penam,<br>tetracycline, peptide,<br>aminocoumarin,<br>diaminopyrimidine,<br>sulfonamide,<br>phenicol, penem |
|  | NalC S209R, G71E<br>[1437027..1437668] | mutation                  |      | macrolide,<br>fluoroquinolone,<br>monobactam,<br>carbapenem,<br>cephalosporin,<br>cephamycin, penam,<br>tetracycline, peptide,<br>aminocoumarin,<br>diaminopyrimidine,<br>sulfonamide,<br>phenicol, penem |
|  | <i>mexT</i><br>[2989362..2990276]      | efflux                    |      | fluoroquinolone,<br>diaminopyrimidine,<br>phenicol                                                                                                                                                        |
|  | MexS V73A<br>[2990497..2991516]        | mutation                  |      | fluoroquinolone,<br>diaminopyrimidine,<br>phenicol                                                                                                                                                        |
|  | <i>mexZ</i><br>[3686021..3686950]      | efflux                    |      | macrolide,<br>fluoroquinolone,<br>aminoglycoside,<br>carbapenem,<br>cephalosporin,<br>cephamycin, penam,<br>tetracycline, acridine<br>dye, phenicol,<br>disinfecting agents<br>and intercalating dyes     |
|  | <i>nfxB</i><br>[5998881..5999444]      | efflux                    |      | macrolide,<br>fluoroquinolone,                                                                                                                                                                            |

|                                       |                                 |                   |  |                                                                                                                                  |
|---------------------------------------|---------------------------------|-------------------|--|----------------------------------------------------------------------------------------------------------------------------------|
|                                       |                                 |                   |  | cephalosporin,<br>penam, tetracycline,<br>aminocoumarin,<br>diaminopyrimidine,<br>phenicol                                       |
| <b><i>Escherichia coli</i> 19/278</b> |                                 |                   |  |                                                                                                                                  |
| 19/278:<br>Chr                        | <i>gadX</i><br>[239242..240066] | efflux            |  | macrolide,<br>fluoroquinolone,<br>penam                                                                                          |
|                                       | <i>gadW</i><br>[240435..241163] | efflux            |  | macrolide,<br>fluoroquinolone,<br>penam                                                                                          |
|                                       | <i>mdtF</i><br>[241526..244639] | efflux            |  | macrolide,<br>fluoroquinolone,<br>penam                                                                                          |
|                                       | <i>mdtE</i><br>[244664..245821] | efflux            |  | macrolide,<br>fluoroquinolone,<br>penam                                                                                          |
|                                       | <i>CRP</i><br>[419421..420053]  | efflux            |  | macrolide,<br>fluoroquinolone,<br>penam                                                                                          |
|                                       | <i>acrF</i><br>[487895..490999] | efflux            |  | fluoroquinolone,<br>cephalosporin,<br>cephamycin, penam                                                                          |
|                                       | <i>acrE</i><br>[491011..492168] | efflux            |  | fluoroquinolone,<br>cephalosporin,<br>cephamycin, penam                                                                          |
|                                       | <i>acrS</i><br>[492567..493229] | efflux            |  | fluoroquinolone,<br>cephalosporin,<br>glycylcycline,<br>cephamycin, penam,<br>tetracycline,<br>rifamycin, phenicol,<br>triclosan |
|                                       | <i>bacA</i><br>[703118..703939] | target alteration |  | peptide                                                                                                                          |
|                                       | <i>tolC</i><br>[726317..727798] | efflux            |  | macrolide,<br>fluoroquinolone,<br>aminoglycoside,<br>carbapenem,<br>cephalosporin,<br>glycylcycline,<br>cephamycin, penam,       |

|  |                                   |                   |      |                                                                             |
|--|-----------------------------------|-------------------|------|-----------------------------------------------------------------------------|
|  |                                   |                   |      | tetracycline, peptide, aminocoumarin, rifamycin, phenicol, triclosan, penem |
|  | <i>rsmA</i><br>[1195009..1195194] | efflux            |      | fluoroquinolone, diaminopyrimidine, phenicol                                |
|  | <i>emrB</i><br>[1200444..1201982] | efflux            |      | fluoroquinolone                                                             |
|  | <i>emrA</i><br>[1201999..1203171] | efflux            |      | fluoroquinolone                                                             |
|  | <i>emrR</i><br>[1203298..1203828] | efflux            |      | fluoroquinolone                                                             |
|  | <i>acrD</i><br>[1399055..1402168] | efflux            |      | aminoglycoside                                                              |
|  | <i>evgS</i><br>[1490405..1493998] | efflux            | GI#6 | macrolide, fluoroquinolone, penam, tetracycline                             |
|  | <i>evgA</i><br>[1494003..1494617] | efflux            | GI#6 | macrolide, fluoroquinolone, penam, tetracycline                             |
|  | <i>emrK</i><br>[1495033..1496196] | efflux            | GI#6 | tetracycline                                                                |
|  | <i>emrY</i><br>[1496196..1497734] | efflux            | GI#6 | tetracycline                                                                |
|  | <i>pmrF</i><br>[1700855..1701823] | target alteration |      | peptide                                                                     |
|  | <i>yojI</i><br>[1760355..1761998] | efflux            |      | peptide                                                                     |
|  | <i>baeR</i><br>[1897456..1898178] | efflux            |      | aminoglycoside, aminocoumarin                                               |
|  | <i>baeS</i><br>[1898175..1899578] | efflux            |      | aminoglycoside, aminocoumarin                                               |
|  | <i>mdtC</i><br>[1900991..1904068] | efflux            |      | aminocoumarin                                                               |
|  | <i>mdtB</i><br>[1904069..1907191] | efflux            |      | aminocoumarin                                                               |
|  | <i>mdtA</i><br>[1907191..1908438] | efflux            |      | aminocoumarin                                                               |
|  | <i>ugd</i><br>[1962819..1963985]  | target alteration | GI#9 | peptide                                                                     |

|  |                                   |                                               |  |                                                                                                                                                                       |
|--|-----------------------------------|-----------------------------------------------|--|-----------------------------------------------------------------------------------------------------------------------------------------------------------------------|
|  | <i>emrE</i><br>[2191298..2191630] | efflux                                        |  | macrolide                                                                                                                                                             |
|  | <i>kpnE</i><br>[2535262..2535627] | efflux                                        |  | macrolide,<br>aminoglycoside,<br>cephalosporin,<br>tetracycline, peptide,<br>rifamycin                                                                                |
|  | <i>kpnF</i><br>[2535614..2535943] | efflux                                        |  | macrolide,<br>aminoglycoside,<br>cephalosporin,<br>tetracycline, peptide,<br>rifamycin                                                                                |
|  | <i>marA</i><br>[2574143..2574526] | efflux; reduced permeability to<br>antibiotic |  | fluoroquinolone,<br>monobactam,<br>carbapenem,<br>cephalosporin,<br>glycylcycline,<br>cephamycin, penam,<br>tetracycline,<br>rifamycin, phenicol,<br>triclosan, penem |
|  | <i>H-NS</i><br>[2876067..2876480] | efflux                                        |  | macrolide,<br>fluoroquinolone,<br>cephalosporin,<br>cephamycin, penam,<br>tetracycline                                                                                |
|  | <i>mdtH</i><br>[3102600..3103808] | efflux                                        |  | fluoroquinolone                                                                                                                                                       |
|  | <i>mdtG</i><br>[3112439..3113665] | efflux                                        |  | fosfomycin                                                                                                                                                            |
|  | <i>msbA</i><br>[3238549..3240297] | efflux                                        |  | nitroimidazole                                                                                                                                                        |
|  | <i>mdfA</i><br>[3350187..3351419] | efflux                                        |  | tetracycline,<br>benzalkonium<br>chloride, rhodamine                                                                                                                  |
|  | <i>kdpE</i><br>[3494059..3494736] | efflux                                        |  | aminoglycoside                                                                                                                                                        |
|  | <i>acrA</i><br>[3708910..3710103] | efflux                                        |  | fluoroquinolone,<br>cephalosporin,<br>glycylcycline, penam,<br>tetracycline,<br>rifamycin, phenicol,<br>triclosan                                                     |

|                 |                                      |                    |  |                                                                                                                   |
|-----------------|--------------------------------------|--------------------|--|-------------------------------------------------------------------------------------------------------------------|
|                 | <i>acrB</i><br>[3710126..3713275]    | efflux             |  | fluoroquinolone,<br>cephalosporin,<br>glycylcycline, penam,<br>tetracycline,<br>rifamycin, phenicol,<br>triclosan |
|                 | <i>ampH</i><br>[3802035..3803192]    | beta-lactamase     |  | cephalosporin, penam                                                                                              |
|                 | <i>ampC</i><br>[4527354..4528520]    | beta-lactamase     |  | cephalosporin, penam                                                                                              |
|                 | <i>eptA</i><br>[4628729..4630372]    | target alteration  |  | peptide                                                                                                           |
|                 | <i>mdtN</i><br>[4659599..4660630]    | efflux             |  | nucleoside, acridine<br>dye, disinfecting<br>agents and<br>intercalating dyes                                     |
|                 | <i>mdtO</i><br>[4660630..4662681]    | efflux             |  | nucleoside, acridine<br>dye, disinfecting<br>agents and<br>intercalating dyes                                     |
|                 | <i>mdtP</i><br>[4662678..4664144]    | efflux             |  | nucleoside, acridine<br>dye, disinfecting<br>agents and<br>intercalating dyes                                     |
|                 | <i>cpxA</i><br>[4922364..4923737]    | efflux             |  | aminoglycoside,<br>aminocoumarin                                                                                  |
| 19/278:<br>pl#1 | <i>dfxA17</i><br>[39937..40410]      | target replacement |  | diaminopyrimidine                                                                                                 |
|                 | <i>tet(B)</i><br>[41983..43188]      | efflux             |  | tetracycline                                                                                                      |
|                 | <i>sul2</i> [48365..49180]           | target replacement |  | sulfonamide                                                                                                       |
|                 | <i>APH(3'')-Ib</i><br>[49241..50044] | inactivation       |  | aminoglycoside                                                                                                    |
|                 | <i>APH(6)-Id</i><br>[50044..50880]   | inactivation       |  | aminoglycoside                                                                                                    |
|                 | <i>mphA</i><br>[58802..59707]        | inactivation       |  | macrolide                                                                                                         |
|                 | <i>TEM-1</i><br>[61118..61978]       | beta-lactamase     |  | monobactam,<br>cephalosporin,<br>penam, penem                                                                     |
| 19/278:<br>pl#2 | <i>CTX-M-55</i><br>[46844..47719]    | inactivation       |  | cephalosporin                                                                                                     |

|                                            |                                                 |                           |  |                                                                                                                   |
|--------------------------------------------|-------------------------------------------------|---------------------------|--|-------------------------------------------------------------------------------------------------------------------|
| 19/278:<br>Chr                             | UhpT E350Q<br>[32210..33601]                    | mutation                  |  | fosfomycin                                                                                                        |
|                                            | EF-Tu R234F<br>[434843..436027]                 | mutation                  |  | elfamycin                                                                                                         |
|                                            | ParC S80I<br>[739940..742198]                   | mutation                  |  | fluoroquinolone                                                                                                   |
|                                            | GyrA D87N, S83L<br>[1729526..1732153]           | mutation                  |  | fluoroquinolone                                                                                                   |
|                                            | Pbp3 D350N,<br>S357N<br>[4146513..4148279]      | mutation                  |  | cephalosporin,<br>cephamycin, penam                                                                               |
|                                            | MarR Y137H,<br>G103S, S3N<br>[2574547..2574981] | mutation                  |  | fluoroquinolone,<br>cephalosporin,<br>glycylcycline, penam,<br>tetracycline,<br>rifamycin, phenicol,<br>triclosan |
|                                            | SoxR G74R<br>[4692022..4692486]                 | mutation                  |  | fluoroquinolone,<br>cephalosporin,<br>glycylcycline, penam,<br>tetracycline,<br>rifamycin, phenicol,<br>triclosan |
| 19/278:<br>pl#1                            | <i>tetR</i> [41278..41901]                      | target alteration; efflux |  | tetracycline                                                                                                      |
| <b><i>Klebsiella pneumoniae</i> 20/245</b> |                                                 |                           |  |                                                                                                                   |
| 20/245:<br>Chr                             | <i>eptB</i><br>[223563..225236]                 | target alteration         |  | peptide                                                                                                           |
|                                            | <i>arnT</i><br>[285276..286931]                 | target alteration         |  | peptide                                                                                                           |
|                                            | <i>CRP</i><br>[399702..400334]                  | efflux                    |  | macrolide,<br>fluoroquinolone,<br>penam                                                                           |
|                                            | <i>crcB</i><br>[835924..836337]                 | efflux                    |  | aminoglycoside                                                                                                    |
|                                            | <i>rsmA</i><br>[1127560..1127745]               | efflux                    |  | fluoroquinolone,<br>diaminopyrimidine,<br>phenicol                                                                |
|                                            | <i>kpnH</i><br>[1135473..1137011]               | efflux                    |  | macrolide,<br>fluoroquinolone,<br>aminoglycoside,<br>carbapenem,                                                  |

|  |                                      |                                               |  |                                                                                                                                                                       |
|--|--------------------------------------|-----------------------------------------------|--|-----------------------------------------------------------------------------------------------------------------------------------------------------------------------|
|  |                                      |                                               |  | cephalosporin,<br>penam, peptide,<br>penem                                                                                                                            |
|  | <i>kpnG</i><br>[1137027..1138199]    | efflux                                        |  | macrolide,<br>fluoroquinolone,<br>aminoglycoside,<br>carbapenem,<br>cephalosporin,<br>penam, peptide,<br>penem                                                        |
|  | <i>emrR</i><br>[1138325..1138855]    | efflux                                        |  | fluoroquinolone                                                                                                                                                       |
|  | <i>adeF</i><br>[1183126..1186278]    | efflux                                        |  | fluoroquinolone,<br>tetracycline                                                                                                                                      |
|  | <i>oqxA</i><br>[1186302..1187477]    | efflux                                        |  | fluoroquinolone,<br>glycylcycline,<br>tetracycline,<br>diaminopyrimidine,<br>nitrofurantoin                                                                           |
|  | <i>adeF</i><br>[1364355..1367468]    | efflux                                        |  | fluoroquinolone,<br>tetracycline                                                                                                                                      |
|  | <i>baeR</i><br>[1665755..1666477]    | efflux                                        |  | aminoglycoside,<br>aminocoumarin                                                                                                                                      |
|  | <i>H-NS</i><br>[2181193..2181600]    | efflux                                        |  | macrolide,<br>fluoroquinolone,<br>cephalosporin,<br>cephamycin, penam,<br>tetracycline                                                                                |
|  | <i>marA</i><br>[2735216..2735590]    | efflux; reduced permeability to<br>antibiotic |  | fluoroquinolone,<br>monobactam,<br>carbapenem,<br>cephalosporin,<br>glycylcycline,<br>cephamycin, penam,<br>tetracycline,<br>rifamycin, phenicol,<br>triclosan, penem |
|  | <i>SHV-207</i><br>[2755694..2756554] | beta-lactamase                                |  | carbapenem,<br>cephalosporin,<br>penam                                                                                                                                |
|  | <i>kpnF</i><br>[2795737..2796066]    | efflux                                        |  | macrolide,<br>aminoglycoside,<br>cephalosporin,                                                                                                                       |

|                                      |                                            |                                    |  |                                                                                                    |
|--------------------------------------|--------------------------------------------|------------------------------------|--|----------------------------------------------------------------------------------------------------|
|                                      |                                            |                                    |  | tetracycline, peptide, rifamycin                                                                   |
|                                      | <i>kpnE</i><br>[2796053..2796415]          | efflux                             |  | macrolide, aminoglycoside, cephalosporin, tetracycline, peptide, rifamycin                         |
|                                      | <i>ompK37</i><br>[2984505..2985629]        | reduced permeability to antibiotic |  | monobactam, carbapenem, cephalosporin, cephamycin, penam, penem                                    |
|                                      | <i>ompA</i><br>[3422707..3423777]          | reduced permeability to antibiotic |  | monobactam, carbapenem, cephalosporin, cephamycin, penam, penem                                    |
|                                      | <i>msbA</i><br>[3473150..3474898]          | efflux                             |  | nitroimidazole                                                                                     |
|                                      | <i>ampH</i><br>[4160179..4161339]          | beta-lactamase                     |  | cephalosporin, penam                                                                               |
|                                      | <i>lptD</i><br>[4471754..4474069]          | efflux                             |  | carbapenem, peptide, aminocoumarin, rifamycin                                                      |
|                                      | <i>fosA6</i><br>[4636455..4636874]         | inactivation                       |  | fosfomycin                                                                                         |
|                                      | UhpT E350Q<br>[39019..40410]               | mutation                           |  | fosfomycin                                                                                         |
|                                      | EF-Tu R234F<br>[415381..416565]            | mutation                           |  | elfamycin                                                                                          |
|                                      | Pbp3 D350N,<br>S357N<br>[4424261..4426027] | mutation                           |  | cephalosporin, cephamycin, penam                                                                   |
|                                      | MarR G103S,<br>Y137H<br>[2734761..2735195] | mutation                           |  | fluoroquinolone, cephalosporin, glycylcycline, penam, tetracycline, rifamycin, phenicol, triclosan |
| <b><i>Escherichia coli</i> 3/145</b> |                                            |                                    |  |                                                                                                    |
| 3/145:<br>Chr                        | <i>gadX</i><br>[242678..243502]            | efflux                             |  | macrolide, fluoroquinolone,                                                                        |



|  |                                   |                   |  |                                                                                                                                                                                                                    |
|--|-----------------------------------|-------------------|--|--------------------------------------------------------------------------------------------------------------------------------------------------------------------------------------------------------------------|
|  |                                   |                   |  | penam                                                                                                                                                                                                              |
|  | <i>mdtF</i><br>[244962..248075]   | efflux            |  | macrolide,<br>fluoroquinolone,<br>penam                                                                                                                                                                            |
|  | <i>mdtE</i><br>[248100..249257]   | efflux            |  | macrolide,<br>fluoroquinolone,<br>penam                                                                                                                                                                            |
|  | <i>CRP</i><br>[449651..450283]    | efflux            |  | macrolide,<br>fluoroquinolone,<br>penam                                                                                                                                                                            |
|  | <i>acrF</i><br>[503002..506106]   | efflux            |  | fluoroquinolone,<br>cephalosporin,<br>cephamycin, penam                                                                                                                                                            |
|  | <i>acrE</i><br>[506118..507275]   | efflux            |  | fluoroquinolone,<br>cephalosporin,<br>cephamycin, penam                                                                                                                                                            |
|  | <i>acrS</i><br>[507674..508336]   | efflux            |  | fluoroquinolone,<br>cephalosporin,<br>glycylcycline,<br>cephamycin, penam,<br>tetracycline,<br>rifamycin, phenicol,<br>triclosan                                                                                   |
|  | <i>bacA</i><br>[707873..708694]   | target alteration |  | peptide                                                                                                                                                                                                            |
|  | <i>tolC</i><br>[729415..730896]   | efflux            |  | macrolide,<br>fluoroquinolone,<br>aminoglycoside,<br>carbapenem,<br>cephalosporin,<br>glycylcycline,<br>cephamycin, penam,<br>tetracycline, peptide,<br>aminocoumarin,<br>rifamycin, phenicol,<br>triclosan, penem |
|  | <i>rsmA</i><br>[1224393..1224578] | efflux            |  | fluoroquinolone,<br>diaminopyrimidine,<br>phenicol                                                                                                                                                                 |
|  | <i>emrB</i><br>[1229519..1231057] | efflux            |  | fluoroquinolone                                                                                                                                                                                                    |
|  | <i>emrA</i><br>[1231074..1232246] | efflux            |  | fluoroquinolone                                                                                                                                                                                                    |

|  |                                    |                                               |      |                                                                                        |
|--|------------------------------------|-----------------------------------------------|------|----------------------------------------------------------------------------------------|
|  | <i>emrR</i><br>[1232373..1232903]  | efflux                                        |      | fluoroquinolone                                                                        |
|  | <i>acrD</i><br>[1469111..1472224]  | efflux                                        |      | aminoglycoside                                                                         |
|  | <i>ampC1</i><br>[1503748..1505049] | beta-lactamase                                |      | cephalosporin,<br>penam                                                                |
|  | <i>evgA</i><br>[1562196..1562810]  | efflux                                        | GI#8 | macrolide,<br>fluoroquinolone,<br>penam, tetracycline                                  |
|  | <i>emrK</i><br>[1563226..1564389]  | efflux                                        | GI#8 | tetracycline                                                                           |
|  | <i>emrY</i><br>[1564389..1565927]  | efflux                                        | GI#8 | tetracycline                                                                           |
|  | <i>pmrF</i><br>[1667680..1668648]  | target alteration                             |      | peptide                                                                                |
|  | <i>yojI</i><br>[1730064..1731707]  | efflux                                        |      | peptide                                                                                |
|  | <i>baeR</i><br>[1875475..1876197]  | efflux                                        |      | aminoglycoside,<br>aminocoumarin                                                       |
|  | <i>baeS</i><br>[1876194..1877597]  | efflux                                        |      | aminoglycoside,<br>aminocoumarin                                                       |
|  | <i>mdtC</i><br>[1879010..1882087]  | efflux                                        |      | aminocoumarin                                                                          |
|  | <i>mdtB</i><br>[1882088..1885210]  | efflux                                        |      | aminocoumarin                                                                          |
|  | <i>mdtA</i><br>[1885210..1886577]  | efflux                                        |      | aminocoumarin                                                                          |
|  | <i>ugd</i><br>[1938232..1939398]   | target alteration                             | GI#9 | peptide                                                                                |
|  | <i>kpnE</i><br>[2424325..2424690]  | efflux                                        |      | macrolide,<br>aminoglycoside,<br>cephalosporin,<br>tetracycline, peptide,<br>rifamycin |
|  | <i>kpnF</i><br>[2424677..2425006]  | efflux                                        |      | macrolide,<br>aminoglycoside,<br>cephalosporin,<br>tetracycline, peptide,<br>rifamycin |
|  | <i>marA</i><br>[2502114..2502497]  | efflux; reduced permeability to<br>antibiotic |      | fluoroquinolone,<br>monobactam,                                                        |

|  |                                   |                |  |                                                                                                                                    |
|--|-----------------------------------|----------------|--|------------------------------------------------------------------------------------------------------------------------------------|
|  |                                   |                |  | carbapenem,<br>cephalosporin,<br>glycylcycline,<br>cephamycin, penam,<br>tetracycline,<br>rifamycin, phenicol,<br>triclosan, penem |
|  | <i>H-NS</i><br>[2785831..2786244] | efflux         |  | macrolide,<br>fluoroquinolone,<br>cephalosporin,<br>cephamycin, penam,<br>tetracycline                                             |
|  | <i>mdtH</i><br>[3043754..3044962] | efflux         |  | fluoroquinolone                                                                                                                    |
|  | <i>mdtG</i><br>[3053593..3054819] | efflux         |  | fosfomycin                                                                                                                         |
|  | <i>msbA</i><br>[3179041..3180789] | efflux         |  | nitroimidazole                                                                                                                     |
|  | <i>mdfA</i><br>[3267358..3268590] | efflux         |  | tetracycline,<br>benzalkonium<br>chloride, rhodamine                                                                               |
|  | <i>kdpE</i><br>[3474915..3475592] | efflux         |  | aminoglycoside                                                                                                                     |
|  | <i>acrA</i><br>[3761075..3762268] | efflux         |  | fluoroquinolone,<br>cephalosporin,<br>glycylcycline,<br>penam, tetracycline,<br>rifamycin, phenicol,<br>triclosan                  |
|  | <i>acrB</i><br>[3762291..3765440] | efflux         |  | fluoroquinolone,<br>cephalosporin,<br>glycylcycline,<br>penam, tetracycline,<br>rifamycin, phenicol,<br>triclosan                  |
|  | <i>ampH</i><br>[3853936..3855093] | beta-lactamase |  | cephalosporin,<br>penam                                                                                                            |
|  | <i>mdtM</i><br>[4404016..4405248] | efflux         |  | fluoroquinolone,<br>lincosamide,<br>nucleoside, acridine<br>dye, phenicol,<br>disinfecting agents<br>and intercalating             |

|                |                                            |                    |       |                                                                               |
|----------------|--------------------------------------------|--------------------|-------|-------------------------------------------------------------------------------|
|                |                                            |                    |       | dyes                                                                          |
|                | <i>ampC</i><br>[4633798..4634964]          | beta-lactamase     |       | cephalosporin,<br>penam                                                       |
|                | <i>eptA</i><br>[4676873..4678516]          | target alteration  |       | peptide                                                                       |
|                | <i>mdtN</i><br>[4701060..4702091]          | efflux             | GI#22 | nucleoside, acridine<br>dye, disinfecting<br>agents and<br>intercalating dyes |
|                | <i>mdtO</i><br>[4702091..4704142]          | efflux             | GI#22 | nucleoside, acridine<br>dye, disinfecting<br>agents and<br>intercalating dyes |
|                | <i>mdtP</i><br>[4704139..4705605]          | efflux             | GI#22 | nucleoside, acridine<br>dye, disinfecting<br>agents and<br>intercalating dyes |
| 3/145:<br>pl#1 | <i>aadA5</i><br>[57111..57899]             | inactivation       |       | aminoglycoside                                                                |
|                | <i>qacEdelta1</i><br>[58105..58452]        | efflux             |       | acridine dye,<br>disinfecting agents<br>and intercalating<br>dyes             |
|                | <i>sulI</i> [58446..59285]                 | target replacement |       | sulfonamide                                                                   |
|                | <i>TEM-1</i><br>[61934..62794]             | beta-lactamase     |       | monobactam,<br>cephalosporin,<br>penam, penem                                 |
|                | <i>catI</i> [65066..65725]                 | inactivation       |       | phenicol                                                                      |
|                | <i>mphA</i><br>[70478..71383]              | inactivation       |       | macrolide                                                                     |
|                | <i>tet(B)</i><br>[73614..74819]            | efflux             |       | tetracycline                                                                  |
| 3/145:<br>Chr  | EF-Tu R234F<br>[465074..466258]            | mutation           |       | elfamycin                                                                     |
|                | GlpT E448K<br>[1682816..1684174]           | mutation           |       | fosfomycin                                                                    |
|                | Pbp3 D350N,<br>S357N<br>[4213379..4215145] | mutation           |       | cephalosporin,<br>cephamycin, penam                                           |
|                | CyaA S352T<br>[5022063..5024609]           | mutation           |       | fosfomycin                                                                    |

|                                                |                                            |                           |      |                                                                                                                                  |
|------------------------------------------------|--------------------------------------------|---------------------------|------|----------------------------------------------------------------------------------------------------------------------------------|
|                                                | MarR Y137H,<br>G103S<br>[2502517..2502951] | mutation                  |      | fluoroquinolone,<br>cephalosporin,<br>glycylcycline,<br>penam, tetracycline,<br>rifamycin, phenicol,<br>triclosan                |
|                                                | SoxR G74R<br>[4727348..4727812]            | target alteration; efflux |      | fluoroquinolone,<br>cephalosporin,<br>glycylcycline,<br>penam, tetracycline,<br>rifamycin, phenicol,<br>triclosan                |
| 3/145:<br>pl#1                                 | <i>tetR</i> [72909..73532]                 | target alteration; efflux |      | tetracycline                                                                                                                     |
| <b><i>Staphylococcus epidermidis</i> 597/2</b> |                                            |                           |      |                                                                                                                                  |
| 597/2.chr                                      | <i>mecA</i><br>[64264..66270]              | target replacement        | GI#1 | penam                                                                                                                            |
|                                                | <i>norA</i><br>[1736479..1737642]          | efflux                    |      | fluoroquinolone,<br>acridine dye,<br>disinfecting agents<br>and intercalating<br>dyes                                            |
| 597/2:<br>pl#2                                 | <i>mphC</i> [4651..5550]                   | inactivation              |      | macrolide                                                                                                                        |
|                                                | <i>msrA</i> [5649..7115]                   | target protection         |      | macrolide,<br>lincosamide,<br>streptogramin,<br>tetracycline,<br>oxazolidinone,<br>phenicol,<br>pleuromutilin                    |
| 597/2:<br>pl#3                                 | <i>blaZ</i> [9180..10025]                  | beta-lactamase            |      | penam                                                                                                                            |
| <b><i>Staphylococcus aureus</i> 597/2/2</b>    |                                            |                           |      |                                                                                                                                  |
| 597/2/2:<br>Chr                                | <i>mepR</i><br>[336896..337315]            | efflux                    |      | glycylcycline,<br>tetracycline                                                                                                   |
|                                                | <i>mgrA</i><br>[697821..698264]            | efflux                    |      | fluoroquinolone,<br>cephalosporin,<br>penam, tetracycline,<br>peptide, acridine dye,<br>disinfecting agents<br>and intercalating |

|                                         |                                            |                |  |                                                                                                                                          |
|-----------------------------------------|--------------------------------------------|----------------|--|------------------------------------------------------------------------------------------------------------------------------------------|
|                                         |                                            |                |  | dyes                                                                                                                                     |
|                                         | <i>norA</i><br>[705915..707081]            | efflux         |  | fluoroquinolone                                                                                                                          |
|                                         | <i>arlR</i><br>[1384420..1385079]          | efflux         |  | fluoroquinolone,<br>acridine dye,<br>disinfecting agents<br>and intercalating<br>dyes                                                    |
|                                         | <i>lmrS</i><br>[2172134..2173576]          | efflux         |  | macrolide,<br>aminoglycoside,<br>oxazolidinone,<br>diaminopyrimidine,<br>phenicol                                                        |
|                                         | GlpT A100V<br>[339403..340761]             | mutation       |  | fosfomycin                                                                                                                               |
|                                         | MurA E291D,<br>T396N<br>[2094696..2095961] | mutation       |  | fosfomycin                                                                                                                               |
| <b><i>Staphylococcus aureus</i> 598</b> |                                            |                |  |                                                                                                                                          |
| 598: Chr                                | <i>mepR</i><br>[316853..317272]            | efflux         |  | glycylcycline,<br>tetracycline                                                                                                           |
|                                         | <i>mgrA</i><br>[723742..724185]            | efflux         |  | fluoroquinolone,<br>cephalosporin,<br>penam, tetracycline,<br>peptide, acridine dye,<br>disinfecting agents<br>and intercalating<br>dyes |
|                                         | <i>norA</i><br>[731838..733004]            | efflux         |  | fluoroquinolone                                                                                                                          |
|                                         | <i>arlR</i><br>[1439202..1439861]          | efflux         |  | fluoroquinolone,<br>acridine dye,<br>disinfecting agents<br>and intercalating<br>dyes                                                    |
|                                         | <i>blaZ</i><br>[1812377..1813222]          | beta-lactamase |  | penam                                                                                                                                    |
|                                         | <i>fosB</i><br>[2473348..2473767]          | inactivation   |  | fosfomycin                                                                                                                               |
|                                         | GlpT A100V, V213I<br>[319364..320722]      | mutation       |  | fosfomycin                                                                                                                               |
|                                         | MurA D278E,                                | mutation       |  | fosfomycin                                                                                                                               |

|                                            |                                 |        |  |                                                                                                                                                                                                                                                |
|--------------------------------------------|---------------------------------|--------|--|------------------------------------------------------------------------------------------------------------------------------------------------------------------------------------------------------------------------------------------------|
|                                            | E291D<br>[2242253..2243518]     |        |  |                                                                                                                                                                                                                                                |
| <b><i>Pseudomonas aeruginosa</i> 7/157</b> |                                 |        |  |                                                                                                                                                                                                                                                |
| 7/157:<br>Chr                              | <i>triA</i><br>[185842..186945] | efflux |  | triclosan                                                                                                                                                                                                                                      |
|                                            | <i>triB</i><br>[186942..188012] | efflux |  | triclosan                                                                                                                                                                                                                                      |
|                                            | <i>triC</i><br>[188009..191056] | efflux |  | triclosan                                                                                                                                                                                                                                      |
|                                            | <i>mexA</i><br>[478587..479738] | efflux |  | macrolide,<br>fluoroquinolone,<br>monobactam,<br>carbapenem,<br>cephalosporin,<br>cephamycin, penam,<br>tetracycline, peptide,<br>aminocoumarin,<br>diaminopyrimidine,<br>sulfonamide,<br>phenicol, penem                                      |
|                                            | <i>mexB</i><br>[479754..482894] | efflux |  | macrolide,<br>fluoroquinolone,<br>monobactam,<br>carbapenem,<br>cephalosporin,<br>cephamycin, penam,<br>tetracycline, peptide,<br>aminocoumarin,<br>diaminopyrimidine,<br>sulfonamide,<br>phenicol, penem                                      |
|                                            | <i>oprM</i><br>[482896..484353] | efflux |  | macrolide,<br>fluoroquinolone,<br>monobactam,<br>aminoglycoside,<br>carbapenem,<br>cephalosporin,<br>cephamycin, penam,<br>tetracycline, peptide,<br>acridine dye,<br>aminocoumarin,<br>diaminopyrimidine,<br>sulfonamide,<br>phenicol, penem, |

|  |                                        |                   |  |                                                                                                    |
|--|----------------------------------------|-------------------|--|----------------------------------------------------------------------------------------------------|
|  |                                        |                   |  | disinfecting agents and intercalating dyes                                                         |
|  | <i>opmD</i><br>[805895..807358]        | efflux            |  | fluoroquinolone, tetracycline, acridine dye, disinfecting agents and intercalating dyes            |
|  | <i>mexI</i><br>[807355..810444]        | efflux            |  | fluoroquinolone, tetracycline, acridine dye, disinfecting agents and intercalating dyes            |
|  | <i>mexH</i><br>[810457..811569]        | efflux            |  | fluoroquinolone, tetracycline, acridine dye, disinfecting agents and intercalating dyes            |
|  | <i>mexG</i><br>[811577..812023]        | efflux            |  | fluoroquinolone, tetracycline, acridine dye, disinfecting agents and intercalating dyes            |
|  | <i>bcr-1</i><br>[929025..930233]       | efflux            |  | bicyclomycin                                                                                       |
|  | <i>APH(3')-IIb</i><br>[946932..947738] | inactivation      |  | aminoglycoside                                                                                     |
|  | <i>PDC-19a</i><br>[959984..961177]     | inactivation      |  | monobactam, carbapenem, cephalosporin                                                              |
|  | <i>yajC</i><br>[1297822..1298160]      | efflux            |  | fluoroquinolone, cephalosporin, glycylcycline, penam, tetracycline, rifamycin, phenicol, triclosan |
|  | <i>mexL</i><br>[1456041..1456679]      | efflux            |  | macrolide, tetracycline, triclosan                                                                 |
|  | <i>mexJ</i><br>[1456775..1457878]      | efflux            |  | macrolide, tetracycline, triclosan                                                                 |
|  | <i>mexK</i><br>[1457883..1460960]      | efflux            |  | macrolide, tetracycline, triclosan                                                                 |
|  | <i>arnA</i>                            | target alteration |  | peptide                                                                                            |



|  |                                   |                           |  |                                                                                                                                                                                                                              |
|--|-----------------------------------|---------------------------|--|------------------------------------------------------------------------------------------------------------------------------------------------------------------------------------------------------------------------------|
|  | [1599360..1601348]                |                           |  |                                                                                                                                                                                                                              |
|  | <i>mexP</i><br>[1639568..1640725] | efflux                    |  | macrolide,<br>carbapenem,<br>tetracycline, acridine<br>dye,<br>diaminopyrimidine,<br>phenicol, disinfecting<br>agents and<br>intercalating dyes                                                                              |
|  | <i>mexQ</i><br>[1640722..1643883] | efflux                    |  | macrolide,<br>carbapenem,<br>tetracycline, acridine<br>dye,<br>diaminopyrimidine,<br>phenicol, disinfecting<br>agents and<br>intercalating dyes                                                                              |
|  | <i>opmE</i><br>[1643880..1645355] | efflux                    |  | macrolide,<br>carbapenem,<br>tetracycline, acridine<br>dye,<br>diaminopyrimidine,<br>phenicol, disinfecting<br>agents and<br>intercalating dyes                                                                              |
|  | <i>cpxR</i><br>[1996279..1996956] | efflux                    |  | macrolide,<br>fluoroquinolone,<br>monobactam,<br>aminoglycoside,<br>carbapenem,<br>cephalosporin,<br>cephamycin, penam,<br>tetracycline, peptide,<br>aminocoumarin,<br>diaminopyrimidine,<br>sulfonamide,<br>phenicol, penem |
|  | <i>cprS</i><br>[2130567..2131862] | target alteration; efflux |  | peptide                                                                                                                                                                                                                      |
|  | <i>cprR</i><br>[2131859..2132530] | target alteration; efflux |  | peptide                                                                                                                                                                                                                      |
|  | <i>muxA</i><br>[2912582..2913862] | efflux                    |  | macrolide,<br>monobactam,<br>tetracycline,                                                                                                                                                                                   |

|  |                                   |                                               |  |                                                                                                                                                                                                          |
|--|-----------------------------------|-----------------------------------------------|--|----------------------------------------------------------------------------------------------------------------------------------------------------------------------------------------------------------|
|  |                                   |                                               |  | aminocoumarin                                                                                                                                                                                            |
|  | <i>muxB</i><br>[2913859..2916990] | efflux                                        |  | macrolide,<br>monobactam,<br>tetracycline,<br>aminocoumarin                                                                                                                                              |
|  | <i>muxC</i><br>[2916987..2920097] | efflux                                        |  | macrolide,<br>monobactam,<br>tetracycline,<br>aminocoumarin                                                                                                                                              |
|  | <i>opmB</i><br>[2920094..2921590] | efflux                                        |  | macrolide,<br>monobactam,<br>tetracycline,<br>aminocoumarin                                                                                                                                              |
|  | <i>oprN</i><br>[2953264..2954682] | efflux                                        |  | fluoroquinolone,<br>diaminopyrimidine,<br>phenicol                                                                                                                                                       |
|  | <i>adeF</i><br>[2954679..2957630] | efflux                                        |  | fluoroquinolone,<br>tetracycline                                                                                                                                                                         |
|  | <i>mexE</i><br>[2957888..2959132] | efflux                                        |  | fluoroquinolone,<br>diaminopyrimidine,<br>phenicol                                                                                                                                                       |
|  | <i>soxR</i><br>[3256411..3256881] | target alteration; efflux                     |  | fluoroquinolone,<br>cephalosporin,<br>glycylcycline,<br>penam, tetracycline,<br>acridine dye,<br>rifamycin, phenicol,<br>triclosan, disinfecting<br>agents and<br>intercalating dyes                     |
|  | <i>adeF</i><br>[3670367..3673504] | efflux                                        |  | fluoroquinolone,<br>tetracycline                                                                                                                                                                         |
|  | <i>parR</i><br>[3964487..3965194] | efflux; reduced permeability to<br>antibiotic |  | macrolide,<br>fluoroquinolone,<br>monobactam,<br>aminoglycoside,<br>carbapenem,<br>cephalosporin,<br>cephamycin, penam,<br>tetracycline, acridine<br>dye, phenicol,<br>penem, disinfecting<br>agents and |

|  |                                    |                                            |       |                                                                                                                                                                                               |
|--|------------------------------------|--------------------------------------------|-------|-----------------------------------------------------------------------------------------------------------------------------------------------------------------------------------------------|
|  |                                    |                                            |       | intercalating dyes                                                                                                                                                                            |
|  | <i>parS</i><br>[3965195..3966481]  | efflux; reduced permeability to antibiotic |       | macrolide, fluoroquinolone, monobactam, aminoglycoside, carbapenem, cephalosporin, cephamycin, penam, tetracycline, acridine dye, phenicol, penem, disinfecting agents and intercalating dyes |
|  | <i>mexN</i><br>[4456361..4459471]  | efflux                                     |       | phenicol                                                                                                                                                                                      |
|  | <i>mexM</i><br>[4459468..4460625]  | efflux                                     |       | phenicol                                                                                                                                                                                      |
|  | <i>pmpM</i><br>[4552685..4554118]  | efflux                                     |       | fluoroquinolone, aminoglycoside, benzalkonium chloride                                                                                                                                        |
|  | <i>fosA</i><br>[4819688..4820095]  | inactivation                               |       | fosfomycin                                                                                                                                                                                    |
|  | <i>rsmA</i><br>[5131306..5131491]  | efflux                                     |       | fluoroquinolone, diaminopyrimidine, phenicol                                                                                                                                                  |
|  | <i>catB7</i><br>[5407303..5407941] | inactivation                               | GI#24 | phenicol                                                                                                                                                                                      |
|  | <i>mexV</i><br>[5574647..5575777]  | efflux                                     |       | macrolide, fluoroquinolone, tetracycline, acridine dye, phenicol, disinfecting agents and intercalating dyes                                                                                  |
|  | <i>mexW</i><br>[5575828..5578884]  | efflux                                     |       | macrolide, fluoroquinolone, tetracycline, acridine dye, phenicol, disinfecting agents and intercalating dyes                                                                                  |
|  | <i>crpP</i>                        | inactivation                               | GI#26 | fluoroquinolone,                                                                                                                                                                              |

|  |                                      |                           |  |                                                                                                                                                 |
|--|--------------------------------------|---------------------------|--|-------------------------------------------------------------------------------------------------------------------------------------------------|
|  | [5774831..5775025]                   |                           |  | ciprofloxacin                                                                                                                                   |
|  | <i>oprJ</i><br>[6041367..6042806]    | efflux                    |  | macrolide,<br>fluoroquinolone,<br>aminoglycoside,<br>cephalosporin,<br>penam, tetracycline,<br>aminocoumarin,<br>diaminopyrimidine,<br>phenicol |
|  | <i>mexD</i><br>[6042812..6045943]    | efflux                    |  | macrolide,<br>fluoroquinolone,<br>aminoglycoside,<br>cephalosporin,<br>penam, tetracycline,<br>aminocoumarin,<br>diaminopyrimidine,<br>phenicol |
|  | <i>mexC</i><br>[6045971..6047035]    | efflux                    |  | macrolide,<br>fluoroquinolone,<br>aminoglycoside,<br>cephalosporin,<br>penam, tetracycline,<br>aminocoumarin,<br>diaminopyrimidine,<br>phenicol |
|  | <i>basS</i><br>[6270164..6271597]    | target alteration; efflux |  | peptide                                                                                                                                         |
|  | <i>opmH</i><br>[6490400..6491848]    | efflux                    |  | triclosan                                                                                                                                       |
|  | <i>emrE</i><br>[6512401..6512733]    | efflux                    |  | aminoglycoside                                                                                                                                  |
|  | <i>OXA-488</i><br>[7116059..7116847] | beta-lactamase            |  | carbapenem,<br>cephalosporin,<br>penam                                                                                                          |
|  | GyrA T83I<br>[2032347..2035118]      | mutation                  |  | fluoroquinolone                                                                                                                                 |
|  | <i>mexR</i><br>[477869..478312]      | target alteration; efflux |  | macrolide,<br>fluoroquinolone,<br>monobactam,<br>carbapenem,<br>cephalosporin,<br>cephamycin, penam,<br>tetracycline, peptide,                  |

|                                             |                                        |          |  |                                                                                                                                                                                                           |
|---------------------------------------------|----------------------------------------|----------|--|-----------------------------------------------------------------------------------------------------------------------------------------------------------------------------------------------------------|
|                                             |                                        |          |  | aminocoumarin,<br>diaminopyrimidine,<br>sulfonamide,<br>phenicol, penem                                                                                                                                   |
|                                             | NalC S209R, G71E<br>[1410005..1410646] | mutation |  | macrolide,<br>fluoroquinolone,<br>monobactam,<br>carbapenem,<br>cephalosporin,<br>cephamycin, penam,<br>tetracycline, peptide,<br>aminocoumarin,<br>diaminopyrimidine,<br>sulfonamide,<br>phenicol, penem |
|                                             | <i>mexT</i><br>[2959363..2960277]      | efflux   |  | fluoroquinolone,<br>diaminopyrimidine,<br>phenicol                                                                                                                                                        |
|                                             | MexS V73A<br>[2960498..2961517]        | mutation |  | fluoroquinolone,<br>diaminopyrimidine,<br>phenicol                                                                                                                                                        |
|                                             | <i>mexZ</i><br>[3668067..3668996]      | efflux   |  | macrolide,<br>fluoroquinolone,<br>aminoglycoside,<br>carbapenem,<br>cephalosporin,<br>cephamycin, penam,<br>tetracycline, acridine<br>dye, phenicol,<br>disinfecting agents<br>and intercalating<br>dyes  |
|                                             | <i>nfxB</i><br>[6047295..6047858]      | efflux   |  | macrolide,<br>fluoroquinolone,<br>cephalosporin,<br>penam, tetracycline,<br>aminocoumarin,<br>diaminopyrimidine,<br>phenicol                                                                              |
| <b><i>Pseudomonas aeruginosa</i> 91/195</b> |                                        |          |  |                                                                                                                                                                                                           |
| 91/195:<br>Chr                              | <i>triA</i><br>[175604..176707]        | efflux   |  | triclosan                                                                                                                                                                                                 |
|                                             | <i>triB</i>                            | efflux   |  | triclosan                                                                                                                                                                                                 |

|  |                                 |        |                                                                                                                                                                                                                                                                                                    |
|--|---------------------------------|--------|----------------------------------------------------------------------------------------------------------------------------------------------------------------------------------------------------------------------------------------------------------------------------------------------------|
|  | [176704..177774]                |        |                                                                                                                                                                                                                                                                                                    |
|  | <i>triC</i><br>[177771..180818] | efflux | triclosan                                                                                                                                                                                                                                                                                          |
|  | <i>mexA</i><br>[496702..497853] | efflux | macrolide,<br>fluoroquinolone,<br>monobactam,<br>carbapenem,<br>cephalosporin,<br>cephamycin, penam,<br>tetracycline, peptide,<br>aminocoumarin,<br>diaminopyrimidine,<br>sulfonamide,<br>phenicol, penem                                                                                          |
|  | <i>mexB</i><br>[497869..501009] | efflux | macrolide,<br>fluoroquinolone,<br>monobactam,<br>carbapenem,<br>cephalosporin,<br>cephamycin, penam,<br>tetracycline, peptide,<br>aminocoumarin,<br>diaminopyrimidine,<br>sulfonamide,<br>phenicol, penem                                                                                          |
|  | <i>oprM</i><br>[501011..502468] | efflux | macrolide,<br>fluoroquinolone,<br>monobactam,<br>aminoglycoside,<br>carbapenem,<br>cephalosporin,<br>cephamycin, penam,<br>tetracycline, peptide,<br>acridine dye,<br>aminocoumarin,<br>diaminopyrimidine,<br>sulfonamide,<br>phenicol, penem,<br>disinfecting agents<br>and intercalating<br>dyes |
|  | <i>opmD</i><br>[856904..858367] | efflux | fluoroquinolone,<br>tetracycline, acridine<br>dye, disinfecting<br>agents and                                                                                                                                                                                                                      |

|  |                                        |                   |  |                                                                                                    |
|--|----------------------------------------|-------------------|--|----------------------------------------------------------------------------------------------------|
|  |                                        |                   |  | intercalating dyes                                                                                 |
|  | <i>mexI</i><br>[858364..861453]        | efflux            |  | fluoroquinolone, tetracycline, acridine dye, disinfecting agents and intercalating dyes            |
|  | <i>mexH</i><br>[861466..862578]        | efflux            |  | fluoroquinolone, tetracycline, acridine dye, disinfecting agents and intercalating dyes            |
|  | <i>mexG</i><br>[862586..863032]        | efflux            |  | fluoroquinolone, tetracycline, acridine dye, disinfecting agents and intercalating dyes            |
|  | <i>bcr-1</i><br>[942933..944141]       | efflux            |  | bicyclomycin                                                                                       |
|  | <i>APH(3')-IIb</i><br>[960851..961657] | inactivation      |  | aminoglycoside                                                                                     |
|  | <i>PDC-1</i><br>[974013..975206]       | inactivation      |  | monobactam, carbapenem, cephalosporin                                                              |
|  | <i>yajC</i><br>[1354543..1354881]      | efflux            |  | fluoroquinolone, cephalosporin, glycylcycline, penam, tetracycline, rifamycin, phenicol, triclosan |
|  | <i>mexL</i><br>[1512834..1513472]      | efflux            |  | macrolide, tetracycline, triclosan                                                                 |
|  | <i>mexJ</i><br>[1513568..1514671]      | efflux            |  | macrolide, tetracycline, triclosan                                                                 |
|  | <i>mexK</i><br>[1514676..1517753]      | efflux            |  | macrolide, tetracycline, triclosan                                                                 |
|  | <i>arnA</i><br>[1649924..1651912]      | target alteration |  | peptide                                                                                            |
|  | <i>mexP</i><br>[1690136..1691293]      | efflux            |  | macrolide, carbapenem, tetracycline, acridine dye, diaminopyrimidine, phenicol, disinfecting       |

|  |                                   |                           |      |                                                                                                                                                                                             |
|--|-----------------------------------|---------------------------|------|---------------------------------------------------------------------------------------------------------------------------------------------------------------------------------------------|
|  |                                   |                           |      | agents and intercalating dyes                                                                                                                                                               |
|  | <i>mexQ</i><br>[1691290..1694451] | efflux                    |      | macrolide, carbapenem, tetracycline, acridine dye, diaminopyrimidine, phenicol, disinfecting agents and intercalating dyes                                                                  |
|  | <i>opmE</i><br>[1694448..1695923] | efflux                    |      | macrolide, carbapenem, tetracycline, acridine dye, diaminopyrimidine, phenicol, disinfecting agents and intercalating dyes                                                                  |
|  | <i>cpxR</i><br>[2045209..2045886] | efflux                    |      | macrolide, fluoroquinolone, monobactam, aminoglycoside, carbapenem, cephalosporin, cephamycin, penam, tetracycline, peptide, aminocoumarin, diaminopyrimidine, sulfonamide, phenicol, penem |
|  | <i>cprS</i><br>[2187670..2188965] | target alteration; efflux |      | peptide                                                                                                                                                                                     |
|  | <i>cprR</i><br>[2188962..2189633] | target alteration; efflux |      | peptide                                                                                                                                                                                     |
|  | <i>adeF</i><br>[2763881..2767057] | efflux                    | GI#8 | fluoroquinolone, tetracycline                                                                                                                                                               |
|  | <i>muxA</i><br>[2970528..2971808] | efflux                    |      | macrolide, monobactam, tetracycline, aminocoumarin                                                                                                                                          |
|  | <i>muxB</i><br>[2971805..2974936] | efflux                    |      | macrolide, monobactam, tetracycline, aminocoumarin                                                                                                                                          |



|  |                                   |                                               |       |                                                                                                                                                                                                          |
|--|-----------------------------------|-----------------------------------------------|-------|----------------------------------------------------------------------------------------------------------------------------------------------------------------------------------------------------------|
|  | <i>muxC</i><br>[2974933..2978043] | efflux                                        |       | macrolide,<br>monobactam,<br>tetracycline,<br>aminocoumarin                                                                                                                                              |
|  | <i>opmB</i><br>[2978040..2979539] | efflux                                        |       | macrolide,<br>monobactam,<br>tetracycline,<br>aminocoumarin                                                                                                                                              |
|  | <i>oprN</i><br>[3011209..3012627] | efflux                                        |       | fluoroquinolone,<br>diaminopyrimidine,<br>phenicol                                                                                                                                                       |
|  | <i>mexF</i><br>[3012624..3015812] | efflux                                        |       | fluoroquinolone,<br>diaminopyrimidine,<br>phenicol                                                                                                                                                       |
|  | <i>mexE</i><br>[3015834..3017078] | efflux                                        |       | fluoroquinolone,<br>diaminopyrimidine,<br>phenicol                                                                                                                                                       |
|  | <i>soxR</i><br>[3338679..3339149] | target alteration; efflux                     |       | fluoroquinolone,<br>cephalosporin,<br>glycylcycline,<br>penam, tetracycline,<br>acridine dye,<br>rifamycin, phenicol,<br>triclosan, disinfecting<br>agents and<br>intercalating dyes                     |
|  | <i>mexY</i><br>[3743423..3746560] | efflux                                        |       | macrolide,<br>fluoroquinolone,<br>aminoglycoside,<br>carbapenem,<br>cephalosporin,<br>cephamycin, penam,<br>tetracycline, acridine<br>dye, phenicol,<br>disinfecting agents<br>and intercalating<br>dyes |
|  | <i>parR</i><br>[3996300..3997007] | efflux; reduced permeability to<br>antibiotic | GI#12 | macrolide,<br>fluoroquinolone,<br>monobactam,<br>aminoglycoside,<br>carbapenem,<br>cephalosporin,<br>cephamycin, penam,                                                                                  |

|  |                                   |                                            |       |                                                                                                                                                                                               |
|--|-----------------------------------|--------------------------------------------|-------|-----------------------------------------------------------------------------------------------------------------------------------------------------------------------------------------------|
|  |                                   |                                            |       | tetracycline, acridine dye, phenicol, penem, disinfecting agents and intercalating dyes                                                                                                       |
|  | <i>parS</i><br>[3997008..3998294] | efflux; reduced permeability to antibiotic | GI#12 | macrolide, fluoroquinolone, monobactam, aminoglycoside, carbapenem, cephalosporin, cephamycin, penam, tetracycline, acridine dye, phenicol, penem, disinfecting agents and intercalating dyes |
|  | <i>mexN</i><br>[4425285..4428395] | efflux                                     |       | phenicol                                                                                                                                                                                      |
|  | <i>mexM</i><br>[4428392..4429549] | efflux                                     |       | phenicol                                                                                                                                                                                      |
|  | <i>pmpM</i><br>[4559107..4560540] | efflux                                     | GI#15 | fluoroquinolone, aminoglycoside, benzalkonium chloride                                                                                                                                        |
|  | <i>fosA</i><br>[4811006..4811413] | inactivation                               |       | fosfomycin                                                                                                                                                                                    |
|  | <i>rsmA</i><br>[5081427..5081612] | efflux                                     |       | fluoroquinolone, diaminopyrimidine, phenicol                                                                                                                                                  |
|  | <i>crpP</i><br>[5246731..5246928] | inactivation                               | CI#19 | fluoroquinolone, ciprofloxacin                                                                                                                                                                |
|  | <i>oprJ</i><br>[5386269..5387708] | efflux                                     |       | macrolide, fluoroquinolone, aminoglycoside, cephalosporin, penam, tetracycline, aminocoumarin, diaminopyrimidine, phenicol                                                                    |
|  | <i>mexD</i><br>[5387714..5390845] | efflux                                     |       | macrolide, fluoroquinolone, aminoglycoside,                                                                                                                                                   |

|  |                                      |                           |  |                                                                                                                                                 |
|--|--------------------------------------|---------------------------|--|-------------------------------------------------------------------------------------------------------------------------------------------------|
|  |                                      |                           |  | cephalosporin,<br>penam, tetracycline,<br>aminocoumarin,<br>diaminopyrimidine,<br>phenicol                                                      |
|  | <i>mexC</i><br>[5390873..5391937]    | efflux                    |  | macrolide,<br>fluoroquinolone,<br>aminoglycoside,<br>cephalosporin,<br>penam, tetracycline,<br>aminocoumarin,<br>diaminopyrimidine,<br>phenicol |
|  | <i>catB7</i><br>[5786427..5787065]   | inactivation              |  | phenicol                                                                                                                                        |
|  | <i>mexV</i><br>[5954386..5955516]    | efflux                    |  | macrolide,<br>fluoroquinolone,<br>tetracycline, acridine<br>dye, phenicol,<br>disinfecting agents<br>and intercalating<br>dyes                  |
|  | <i>mexW</i><br>[5955567..5958623]    | efflux                    |  | macrolide,<br>fluoroquinolone,<br>tetracycline, acridine<br>dye, phenicol,<br>disinfecting agents<br>and intercalating<br>dyes                  |
|  | <i>basS</i><br>[6193592..6195025]    | target alteration; efflux |  | peptide                                                                                                                                         |
|  | <i>OpmH</i><br>[6411491..6412939]    | efflux                    |  | triclosan                                                                                                                                       |
|  | <i>emrE</i><br>[6433494..6433826]    | efflux                    |  | aminoglycoside                                                                                                                                  |
|  | <i>OXA-850</i><br>[7036044..7036832] | beta-lactamase            |  | carbapenem,<br>cephalosporin,<br>penam                                                                                                          |
|  | QseB L71R<br>[6192903..6193568]      | mutation                  |  | peptide                                                                                                                                         |
|  | <i>mexR</i><br>[495984..496427]      | target alteration; efflux |  | macrolide,<br>fluoroquinolone,<br>monobactam,                                                                                                   |

|                                                   |                                   |        |                                                                                                                                                                             |
|---------------------------------------------------|-----------------------------------|--------|-----------------------------------------------------------------------------------------------------------------------------------------------------------------------------|
|                                                   |                                   |        | carbapenem, cephalosporin, cephamycin, penam, tetracycline, peptide, aminocoumarin, diaminopyrimidine, sulfonamide, phenicol, penem                                         |
|                                                   | <i>nalC</i><br>[1466771..1467412] | efflux | macrolide, fluoroquinolone, monobactam, carbapenem, cephalosporin, cephamycin, penam, tetracycline, peptide, aminocoumarin, diaminopyrimidine, sulfonamide, phenicol, penem |
|                                                   | <i>mexT</i><br>[3017309..3018223] | efflux | fluoroquinolone, diaminopyrimidine, phenicol                                                                                                                                |
|                                                   | <i>mexS</i><br>[3018444..3019463] | efflux | fluoroquinolone, diaminopyrimidine, phenicol                                                                                                                                |
|                                                   | <i>mexZ</i><br>[3741421..3742053] | efflux | macrolide, fluoroquinolone, aminoglycoside, carbapenem, cephalosporin, cephamycin, penam, tetracycline, acridine dye, phenicol, disinfecting agents and intercalating dyes  |
|                                                   | <i>nfxB</i><br>[5392197..5392760] | efflux | macrolide, fluoroquinolone, cephalosporin, penam, tetracycline, aminocoumarin, diaminopyrimidine, phenicol                                                                  |
| <b><i>Streptococcus pneumoniae</i> PHRX1-2021</b> |                                   |        |                                                                                                                                                                             |

|                        |                                       |                   |  |                           |
|------------------------|---------------------------------------|-------------------|--|---------------------------|
| PHRX1-<br>2021:<br>Chr | <i>pmrA</i><br>[1198848..1200047]     | efflux            |  | fluoroquinolone           |
|                        | <i>patB</i><br>[1903612..1905378]     | efflux            |  | fluoroquinolone           |
|                        | <i>patA</i><br>[1906169..1907863]     | efflux            |  | fluoroquinolone           |
|                        | <i>rlmA(II)</i><br>[1934578..1935426] | target alteration |  | macrolide,<br>lincosamide |
